# Supplementary material for: Ocean alkalinity enhancement using sodium carbonate salts does not lead to measurable changes in Fe dynamics in a mesocosm experiment
Source: Copernicus journal article supplement (doi:10.5194/bg-21-2705-2024), 2024-06-05
Supplement: Supplementary file 1 [file bg-21-2705-2024-supplement.pdf]

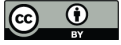

*Supplement of*

## **Ocean alkalinity enhancement using sodium carbonate salts does not lead to measurable changes in Fe dynamics in a mesocosm experiment**

**David González-Santana et al.**

*Correspondence to:* David González-Santana ([david.gonzalez@fpct.ulpgc.es](mailto:david.gonzalez@fpct.ulpgc.es))

The copyright of individual parts of the supplement might differ from the article licence.

## **Supplementary material**

### Ocean alkalinity enhancement using sodium carbonate salts does not impact Fe dynamics in a mesocosm experiment

David González-Santana<sup>1</sup>, María Segovia<sup>2</sup>, Melchor González-Dávila<sup>1</sup>, Librada Ramírez<sup>2</sup>, Aridane G. González<sup>1</sup>, Leonardo J. Pozzo-Pirotta<sup>2</sup>, Veronica Arnone<sup>1</sup>, Víctor Vázquez<sup>2</sup>, Ulf Riebesell<sup>3</sup>, J. Magdalena Santana-Casiano<sup>1</sup>.

<sup>1</sup>Instituto de Oceanografía y Cambio Global, IOCAG, Universidad de Las Palmas de Gran Canaria, ULPGC, Spain.

<sup>2</sup>Department of Ecology, Faculty of Sciences, University of Malaga, Málaga, Spain.

<sup>3</sup>GEOMAR Helmholtz Centre for Ocean Research Kiel, Kiel, Germany.

\*Corresponding author: david.gonzalez@fpct.ulpgc.es

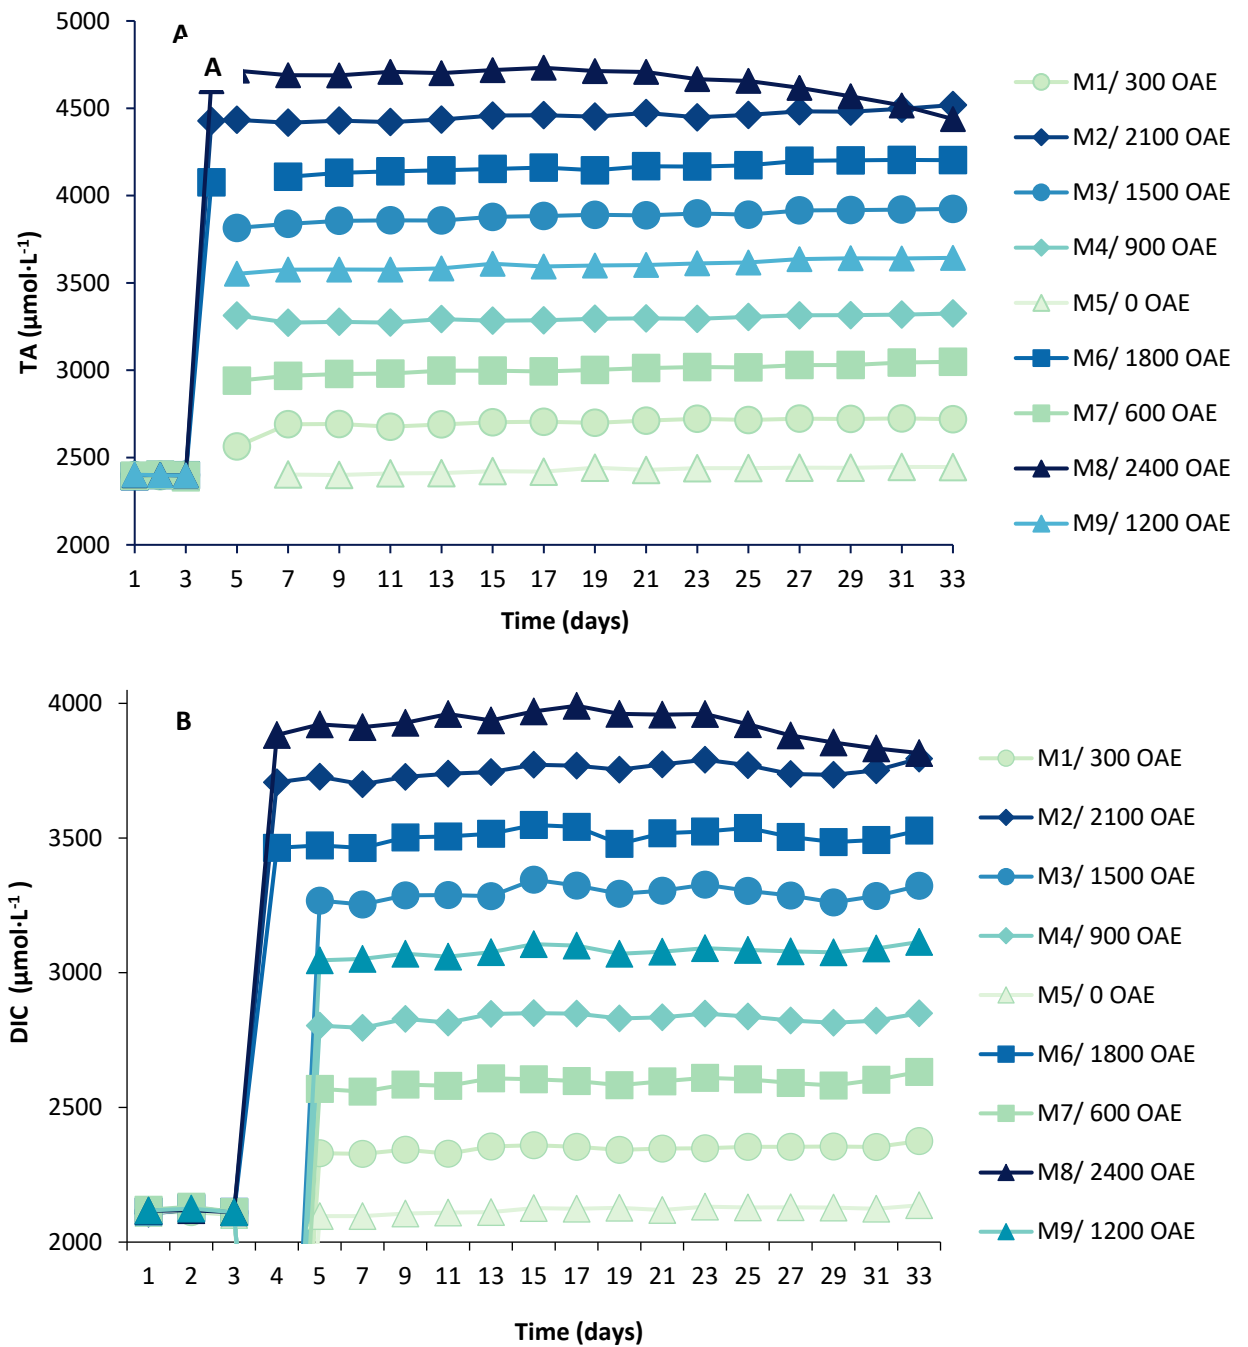

**Figure S1.** A) Evolution of total alkalinity (TA) ( $\mu\text{mol}\cdot\text{L}^{-1}$ ); and B) dissolved inorganic carbon (DIC) ( $\mu\text{mol}\cdot\text{L}^{-1}$ ) over time during the mesocosms experiment. Reproduction with permission of *Biogeosciences*, Marin-Samper et al. This issue.

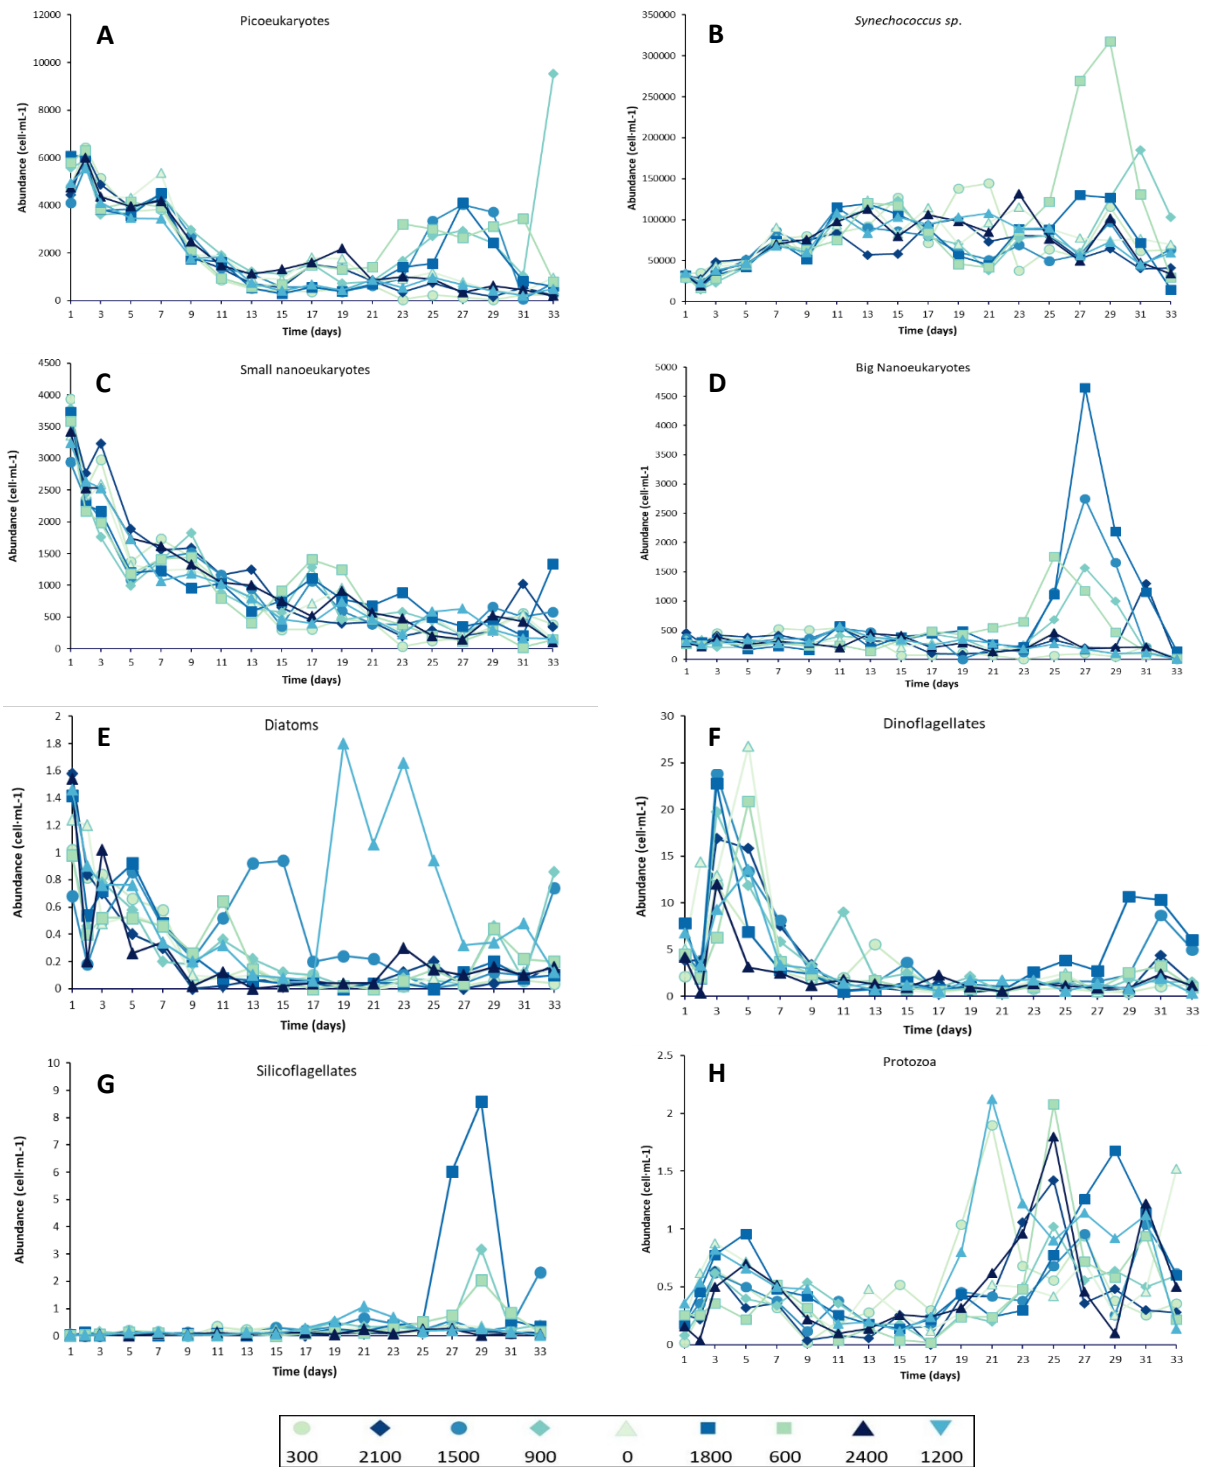

**Figure S2.** Cell abundance of phyto- and microphytoplankton in cell·ml<sup>-1</sup>. A) Picoeukaryotes <2  $\mu\text{m}$ ; B) *Synechococcus* spp. <2  $\mu\text{m}$ ; C) Small nanoeukaryotes 2-20  $\mu\text{m}$ ; D) Large nanoeukaryotes >20  $\mu\text{m}$ ; E) Diatoms; F) Dinoflagellates; G) Silicoflagellates; H) Protozoa. Reproduction in with permission of *Biogeosciences*, *Marin-Samper et al. A-D* and *Ramirez et al. for E-H. This issue.*

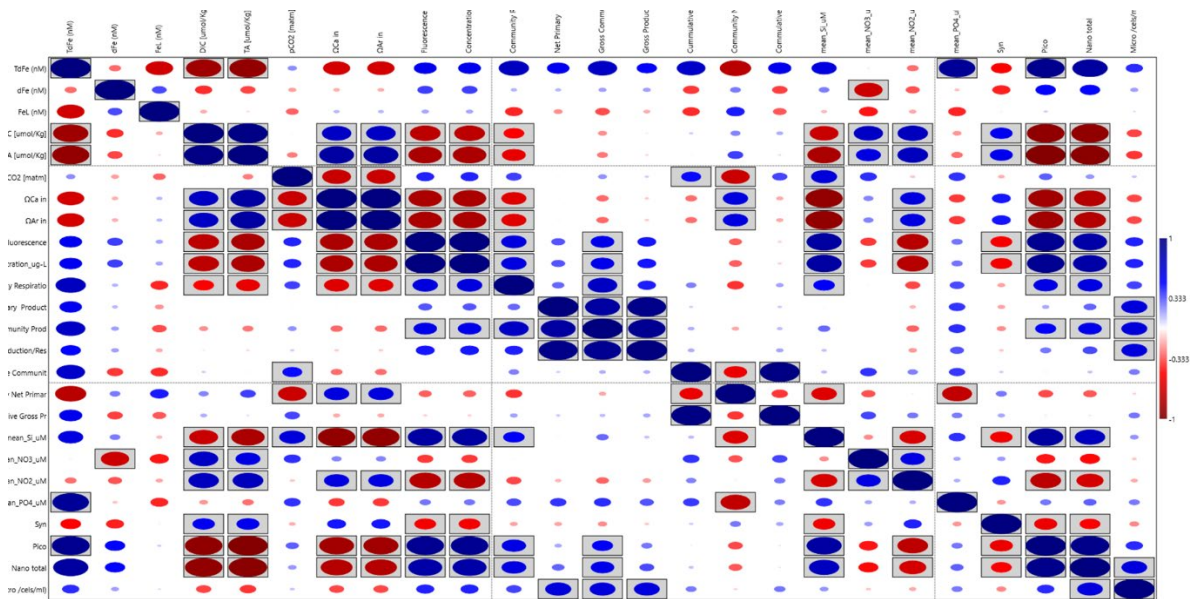

**Figure S3.** Correlation plot between the measured iron size fractions and iron ligand concentrations with other physico-chemical parameters. Boxed dots present significant correlation ( $p < 0.05$ ). Blue dots present positive correlations, while red dots present negative correlations.
